# Supplementary material for: Activating gene expression in mammalian cells with promoter-targeted duplex RNAs
Source: Springer Nature journal article supplement (doi:10.1038/nchembio860), 2007-01-28
Supplement: 41589_2007_BFnchembio860_MOESM159_ESM.pdf [file 41589_2007_BFnchembio860_MOESM159_ESM.pdf]

### Supplementary Figure 3.

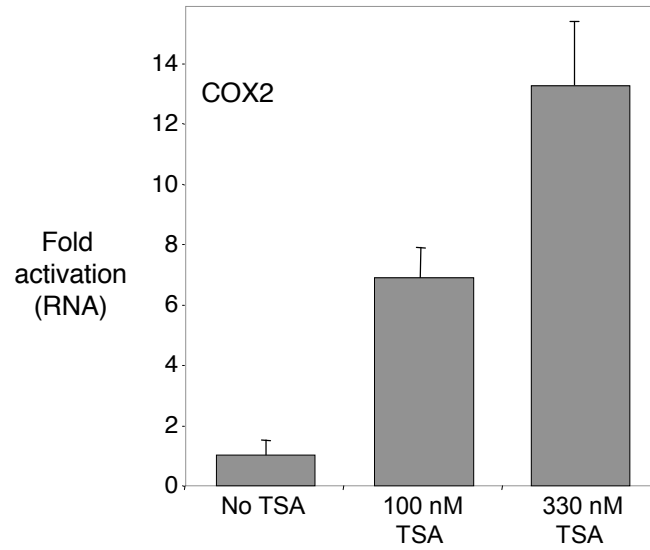

**Supplementary Fig. 3. Treatment of MCF-7 cells with TSA yields increases COX-2 expression.** QPCR showing activation of cyclooxygenase-2 (COX-2) by the histone deacetylase inhibitor (HDAC) trichostatin-A (TSA). Fold activation is relative to controls cells that were not treated with TSA.
