# Supplementary material for: Activating gene expression in mammalian cells with promoter-targeted duplex RNAs
Source: Springer Nature journal article supplement (doi:10.1038/nchembio860), 2007-01-28
Supplement: 41589_2007_BFnchembio860_MOESM160_ESM.pdf [file 41589_2007_BFnchembio860_MOESM160_ESM.pdf]

## Supplementary Figure 4.

| Gene                                                                                | Accession    | Length | E-Value | Score | Overlap (Shown In Red)                                                           |
|-------------------------------------------------------------------------------------|--------------|--------|---------|-------|----------------------------------------------------------------------------------|
| progesterone receptor (PGR)                                                         | NM_000926    | 19     | 0.002   | 38.2  | 5' - TT GCU GUC UGG CCA GUC CAC A - 3'<br>3' - CGA CAG ACC GGU CAG GUG U TT - 5' |
| ataxin 2 (ATXN2)                                                                    | NM_002973    | 15     | 0.44    | 30.2  | 5' - TT GCU GUC UGG CCA GUC CAC A - 3'<br>3' - CGA CAG ACC GGU CAG GUG U TT - 5' |
| unc-13 homolog D                                                                    | NM_199242    | 14     | 1.7     | 28.2  | 5' - TT GCU GUC UGG CCA GUC CAC A - 3'<br>3' - CGA CAG ACC GGU CAG GUG U TT - 5' |
| family with sequence similarity 83, member G (FAM83G)                               | NM_001039999 | 14     | 1.7     | 28.2  | 5' - TT GCU GUC UGG CCA GUC CAC A - 3'<br>3' - CGA CAG ACC GGU CAG GUG U TT - 5' |
| apoptotic chromatin condensation inducer 1 (ACIN1),                                 | NM_014977    | 14     | 1.7     | 28.2  | 5' - TT GCU GUC UGG CCA GUC CAC A - 3'<br>3' - CGA CAG ACC GGU CAG GUG U TT - 5' |
| chromosome 8 open reading frame 13 (C8orf13)                                        | NM_053279    | 14     | 1.7     | 28.2  | 5' - TT GCU GUC UGG CCA GUC CAC A - 3'<br>3' - CGA CAG ACC GGU CAG GUG U TT - 5' |
| microtubule associated monooxygenase, calponin and LIM domain containing 1 (MICAL1) | NM_022765    | 14     | 1.7     | 28.2  | 5' - TT GCU GUC UGG CCA GUC CAC A - 3'<br>3' - CGA CAG ACC GGU CAG GUG U TT - 5' |
| arachidonate 5-lipoxygenase (ALOX5)                                                 | XM_001127464 | 13     | 6.9     | 26.3  | 5' - TT GCU GUC UGG CCA GUC CAC A - 3'<br>3' - CGA CAG ACC GGU CAG GUG U TT - 5' |

**Supplementary Fig. 4 A) Contiguous sequence similarity results of PR11.** NCBI's Homo Sapiens RefSeq RNA database (a comprehensive database of non-redundant RNA transcripts) was searched using the Blastn method (a direct nucleotide comparison) for both strands of the PR11 duplex using a word size setting of 7, a nucleotide mismatch penalty of -3, and an expect value cut off value of 1000. The most significant hit was a 19 base exact match to the progesterone receptor promoter with an expect-value (the number of times the sequence in question is expected to occur just by chance when searching a database of size n, n=39,240 for RefSeq RNA) of 0.002. The next hit was only 15 bases long and had an Expect-value of 0.44. All additional hits were 14 bases or less in length and received Expect-values of 1.7 and above.

## Supplementary Figure 4 (cont).

| Gene                                                                         | Accession   | Length | MM | E-Value | Overlap (Shown In Red)                                                           |
|------------------------------------------------------------------------------|-------------|--------|----|---------|----------------------------------------------------------------------------------|
| progesterone receptor (PGR)                                                  | NM_000926   | 19     | 0  | 0.11    | 5' - GCU GUC UGG CCA GUC CAC A TT - 3'<br>3' - TT CGA CAG ACC GGU CAG GUG U - 5' |
| tubulin, alpha 1 (TUBA1)                                                     | NM_006000.1 | 19     | 2  | 8.6     | 5' - GCU GUC UGG CCA GUC CAC A TT - 3'<br>3' - TT CGA CAG ACC GGU CAG GUG U - 5' |
| similar to potassium channel tetramerisation domain containing 1 (LOC389768) | XR_017025.1 | 19     | 2  | 8.6     | 5' - GCU GUC UGG CCA GUC CAC A TT - 3'<br>3' - TT CGA CAG ACC GGU CAG GUG U - 5' |
| similar to Aldose reductase (AR) (Aldehyde reductase) (LOC390482)            | XR_018461.1 | 19     | 3  | 77      | 5' - GCU GUC UGG CCA GUC CAC A TT - 3'<br>3' - TT CGA CAG ACC GGU CAG GUG U - 5' |
| T-cell lymphoma invasion and metastasis 2 (TIAM2).                           | NM_012454.3 | 19     | 3  | 77      | 5' - GCU GUC UGG CCA GUC CAC A TT - 3'<br>3' - TT CGA CAG ACC GGU CAG GUG U - 5' |
| receptor-interacting serine-threonine kinase 3 (RIPK3)                       | NM_006871.3 | 19     | 3  | 77      | 5' - GCU GUC UGG CCA GUC CAC A TT - 3'<br>3' - TT CGA CAG ACC GGU CAG GUG U - 5' |
| SH3 and PX domains 2A (SH3PXD2A)                                             | NM_014631.2 | 19     | 3  | 77      | 5' - GCU GUC UGG CCA GUC CAC A TT - 3'<br>3' - TT CGA CAG ACC GGU CAG GUG U - 5' |
| thioredoxin reductase 1 (TXNRD1)                                             | NM_003330.2 | 19     | 3  | 77      | 5' - GCU GUC UGG CCA GUC CAC A TT - 3'<br>3' - TT CGA CAG ACC GGU CAG GUG U - 5' |
| nuclear mitotic apparatus protein 1 (NUMA1)                                  | NM_006185.2 | 19     | 3  | 77      | 5' - GCU GUC UGG CCA GUC CAC A TT - 3'<br>3' - TT CGA CAG ACC GGU CAG GUG U - 5' |
| GTP binding protein 1 (GTPBP1)                                               | NM_004286.4 | 19     | 3  | 77      | 5' - GCU GUC UGG CCA GUC CAC A TT - 3'<br>3' - TT CGA CAG ACC GGU CAG GUG U - 5' |
| collagen, type VIII, alpha 2 (COL8A2)                                        | NM_005202.1 | 19     | 3  | 77      | 5' - GCU GUC UGG CCA GUC CAC A TT - 3'<br>3' - TT CGA CAG ACC GGU CAG GUG U - 5' |

**Supplementary Fig. 4 B) Non-contiguous sequence similarity results of PR11.** NCBI's Homo Sapiens RefSeq RNA database (a comprehensive database of non-redundant RNA transcripts) was searched using the Blastn method (a direct nucleotide comparison) for both strands of the PR11 duplex using a word size setting of 7, a nucleotide mismatch penalty of -1, and an expect value cut off value of 1000. The most significant hit was a 19 base exact match to the progesterone receptor promoter with an expect-value (the number of times the sequence in question is expected to occur just by chance when searching a database of size n, n=39,240 for RefSeq RNA) of 0.11. All additional hits contained two or more mismatches and expect values of 8.6 and above.

## Supplementary Figure 4 (cont).

| Gene                                                                             | Accession   | Length | E-Value | Score | Overlap (Shown In Red)                                                           |
|----------------------------------------------------------------------------------|-------------|--------|---------|-------|----------------------------------------------------------------------------------|
| progesterone receptor (PGR)                                                      | NM_000926   | 19     | 0.002   | 38.2  | 5' - GUU GUU AGA AAG CUG UCU G TT - 3'<br>3' - TT CAA CAA UCU UUC GAC AGA C - 5' |
| metastasis associated lung adenocarcinoma transcript 1 (non-coding RNA) (MALAT1) | NR_002819.1 | 15     | 1.5     | 30.2  | 5' - GUU GUU AGA AAG CUG UCU G TT - 3'<br>3' - TT CAA CAA UCU UUC GAC AGA C - 5' |
| inter-alpha (globulin) inhibitor H5 (ITIH5)                                      | NM_030569.3 | 14     | 1.5     | 28.2  | 5' - GUU GUU AGA AAG CUG UCU G TT - 3'<br>3' - TT CAA CAA UCU UUC GAC AGA C - 5' |
| calsequestrin 2 (cardiac muscle) (CASQ2)                                         | NM_001232.1 | 14     | 1.7     | 28.2  | 5' - GUU GUU AGA AAG CUG UCU G TT - 3'<br>3' - TT CAA CAA UCU UUC GAC AGA C - 5' |
| coiled-coil domain containing 100 (CCDC100)                                      | NM_153223.2 | 13     | 5.7     | 26.3  | 5' - GUU GUU AGA AAG CUG UCU G TT - 3'<br>3' - TT CAA CAA UCU UUC GAC AGA C - 5' |

**Supplementary Fig. 4 C) Contiguous sequence similarity results of PR22.** NCBI's Homo Sapiens RefSeq RNA database (a comprehensive database of non-redundant RNA transcripts) was searched using the Blastn method (a direct nucleotide comparison) for both strands of the PR22 duplex using a word size setting of 7, a nucleotide mismatch penalty of -3, and an expect value cut off value of 1000. The most significant hit was a 19 base exact match to the progesterone receptor promoter with an expect-value (the number of times the sequence in question is expected to occur just by chance when searching a database of size n,  $n=39,240$  for RefSeq RNA) of 0.002. The next hit was only 15 bases long and had an Expect-value of 1.5. All additional hits were 14 bases or less in length and received Expect-values of 1.5 and above.

## Supplementary Figure 4 (cont.)

| Gene                                                                             | Accession   | Length | MM | E-Value | Overlap (Shown In Red)                                                           |
|----------------------------------------------------------------------------------|-------------|--------|----|---------|----------------------------------------------------------------------------------|
| progesterone receptor (PGR)                                                      | NM_000926.3 | 19     | 0  | 0.11    | 5' - GUU GUU AGA AAG CUG UCU G TT - 3'<br>3' - TT CAA CAA UCU UUC GAC AGA C - 5' |
| transcription factor 12 (HTF4, helix-loop-helix transcription factors 4) (TCF12) | NM_003205.3 | 19     | 3  | 77      | 5' - GUU GUU AGA AAG CUG UCU G TT - 3'<br>3' - TT CAA CAA UCU UUC GAC AGA C - 5' |
| HIV-1 Rev binding protein (HRB)                                                  | NM_004504.3 | 19     | 3  | 77      | 5' - GUU GUU AGA AAG CUG UCU G TT - 3'<br>3' - TT CAA CAA UCU UUC GAC AGA C - 5' |
| glycosyltransferase 1 domain containing 1 (GLT1D1)                               | NM_144669.1 | 19     | 3  | 77      | 5' - GUU GUU AGA AAG CUG UCU G TT - 3'<br>3' - TT CAA CAA UCU UUC GAC AGA C - 5' |
| carboxypeptidase A6 (CPA6)                                                       | NM_020361.2 | 19     | 3  | 77      | 5' - GUU GUU AGA AAG CUG UCU G TT - 3'<br>3' - TT CAA CAA UCU UUC GAC AGA C - 5' |
| leucine rich repeat transmembrane neuronal 2 (LRRTM2)                            | NM_015564.1 | 19     | 3  | 77      | 5' - GUU GUU AGA AAG CUG UCU G TT - 3'<br>3' - TT CAA CAA UCU UUC GAC AGA C - 5' |
| low density lipoprotein-related protein 2 (LRP2)                                 | NM_004525.1 | 19     | 3  | 77      | 5' - GUU GUU AGA AAG CUG UCU G TT - 3'<br>3' - TT CAA CAA UCU UUC GAC AGA C - 5' |

**Supplementary Fig. 4 D) Non-contiguous sequence similarity results of PR22.** NCBI's Homo Sapiens RefSeq RNA database (a comprehensive database of non-redundant RNA transcripts) was searched using the Blastn method (a direct nucleotide comparison) for both strands of the PR22 duplex using a word size setting of 7, a nucleotide mismatch penalty of -1, and an expect value cut off value of 1000. The most significant hit was a 19 base exact match to the progesterone receptor promoter with an expect-value (the number of times the sequence in question is expected to occur just by chance when searching a database of size n, n=39,240 for RefSeq RNA) of 0.11. All additional hits contained three or more mismatches and expect values of 77 and above.

| Gene                        | Accession | Length | MM |
|-----------------------------|-----------|--------|----|
| progesterone receptor (PGR) | NM_000926 | 19     | 0  |

**Supplementary Fig. 4 E) Common Blast results of PR11 and PR22.** NCBI's Homo Sapiens RefSeq RNA database (a comprehensive database of non-redundant RNA transcripts) was searched using the Blastn method (a direct nucleotide comparison) for both strands of the PR11 and PR22 duplexes using a word size setting of 7, a nucleotide mismatch penalty of -1, and an expect value cut off value of 1000. The only common hit was the 19 base exact match to the progesterone receptor promoter.
